# Supplementary material
Source: MDPI journal article supplement (https://www.mdpi.com/2073-4395/11/9/1859)
Supplement: s1 [file s1]

## Figures S1-S7

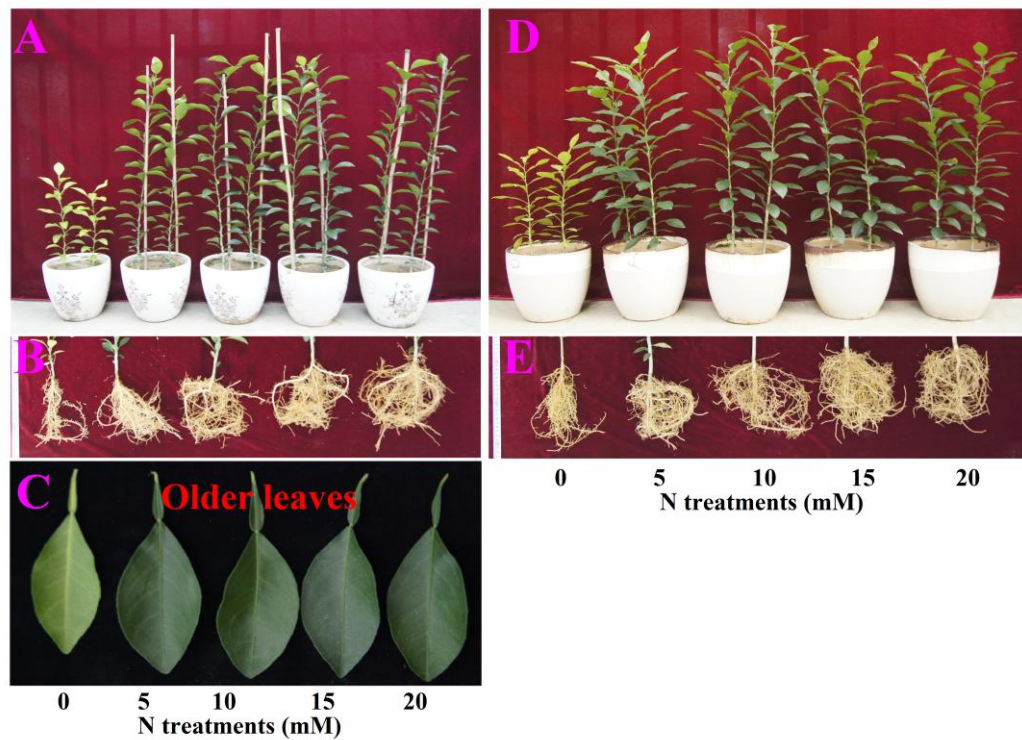

**Figure S1.** Effects of nitrogen (N) supply on growth of *Citrus sinensis* (A-C) and *Citrus grandis* (D-E) seedlings.

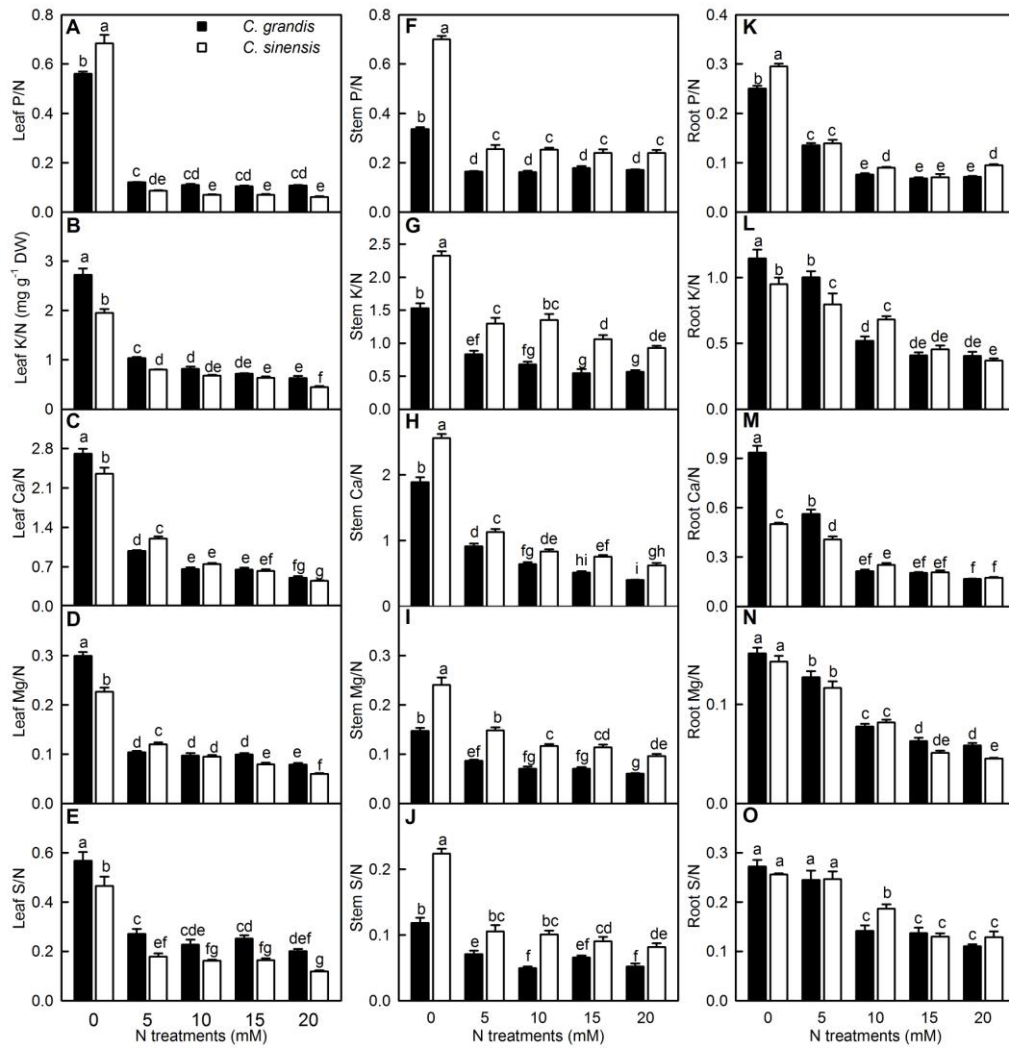

**Figure S2.** Effects of N supply on mean ( $\pm$  SE,  $n = 4$ ) ratios of P, K, Ca, Mg or S concentration to N concentration in leaves (A-E), stems (F-J) and roots (K-O) of *Citrus grandis* and *Citrus sinensis* seedlings. Different letters above the bars indicate a significant difference at  $P < 0.05$ . The same notation will be used in [Figures S3-S5](#).

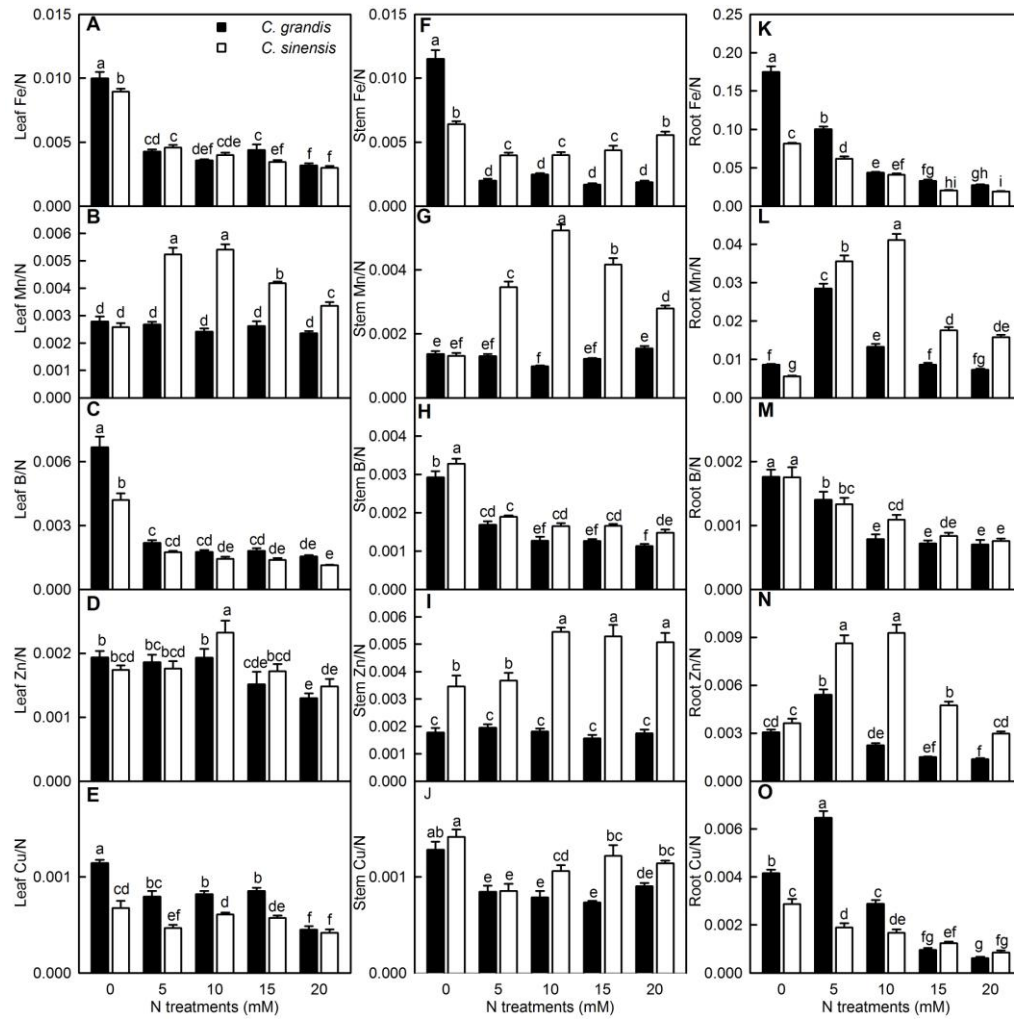

**Figure S3.** Effects of N supply on mean ( $\pm$  SE,  $n = 4$ ) ratios of Fe, Mn, B, Zn or Cu concentration to N concentration in leaves (A-E), stems (F-J) and roots (K-O) of *Citrus grandis* and *Citrus sinensis* seedlings.

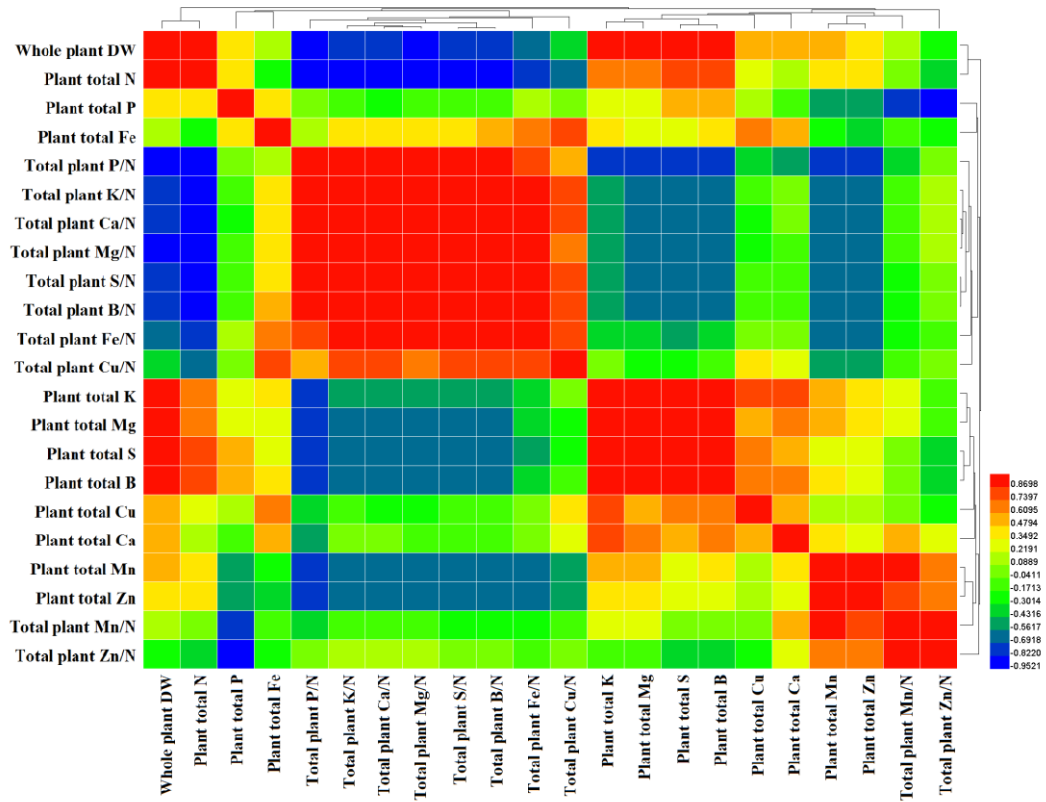

**Figure S4.** Matrices of Pearson correlation coefficients (PCCs) for the mean whole plant DW ( $n = 12$ ), element uptake per plant (plant total element content) and the ratio of element uptake per plant to N uptake per plant ( $n = 4$ ) in *C. grandis* and *C. sinensis* seedlings. Data for whole plant DW came from [Figure 1](#). Data for the ratios came from [Figure 5](#).

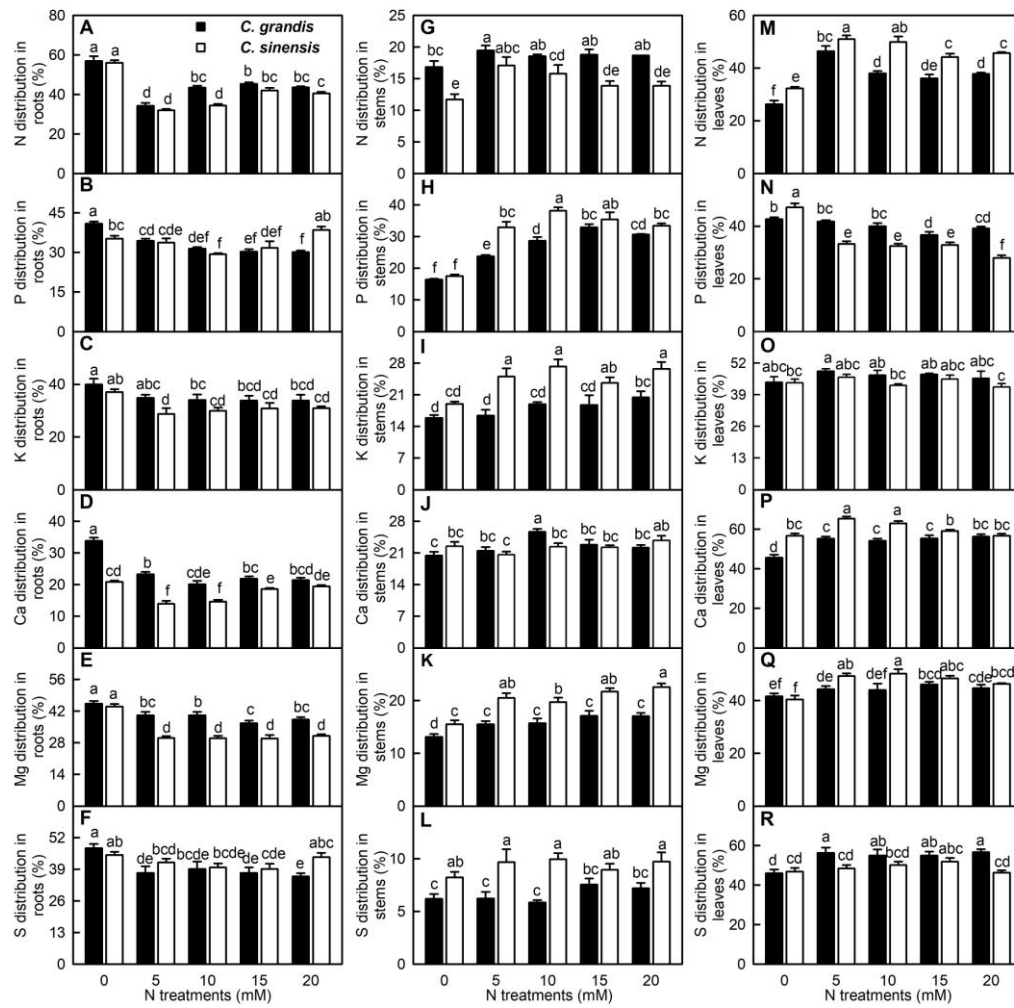

**Figure S5.** Effects of N supply on mean ( $\pm$  SE,  $n = 4$ ) N, P, K, Ca, Mg and S distribution in roots (A-F), stems (G-L) and leaves (M-R) of *Citrus grandis* and *Citrus sinensis* seedlings.

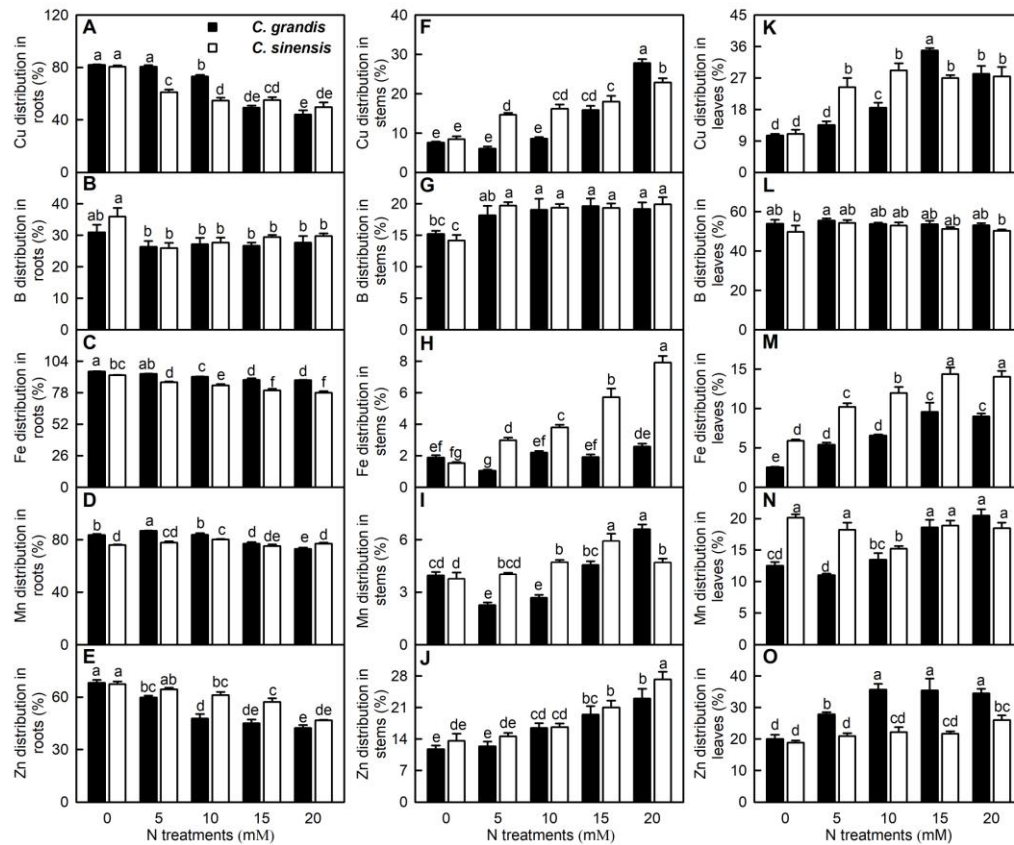

**Figure S6.** Effects of N supply on mean ( $\pm$  SE,  $n = 4$ ) Cu, B, Fe Mn and Zn distribution in roots (A-E), stems (F-J) and leaves (K-O) of *Citrus grandis* and *Citrus sinensis* seedlings.

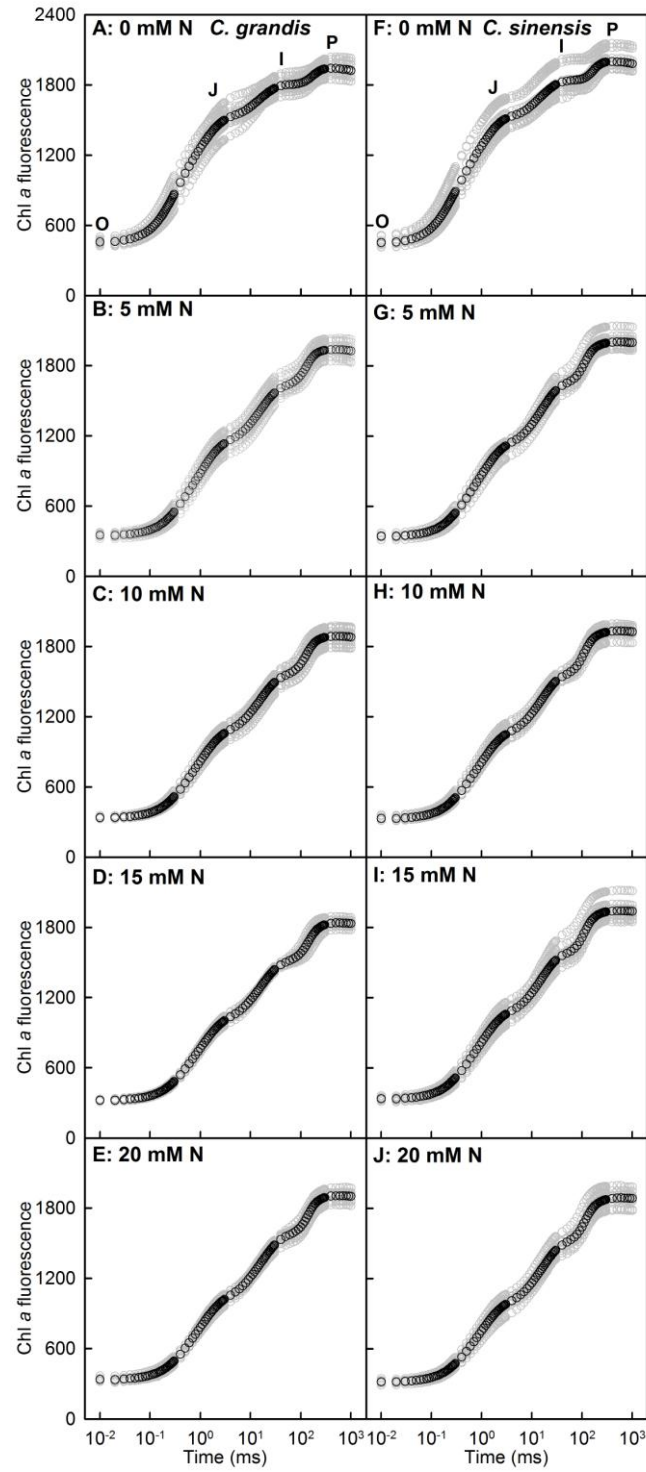

**Figure S7.** Effects of N supply on the high-light-induced OJIP transients of dark-adapted *C. grandis* (A-E) and *C. sinensis* (F-J) leaves plotted on a logarithmic time scale (0.01 to 1000 ms). Black circles were mean transients of 9 measured samples and gray circles were transients of single measurement.
